# Supplementary material
Source: PubMed Central journal article supplement (PMC4143385)

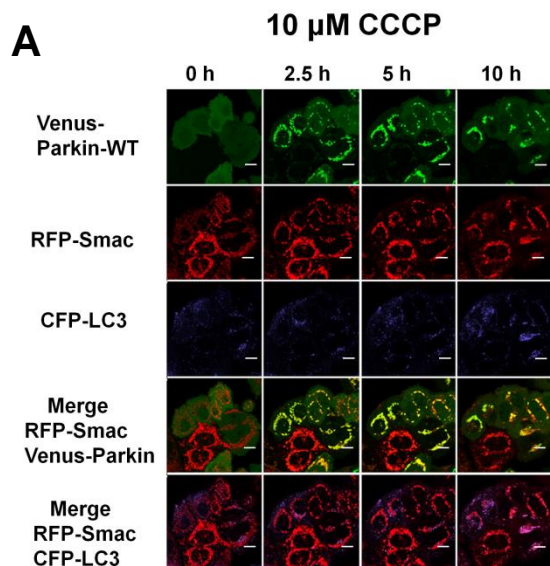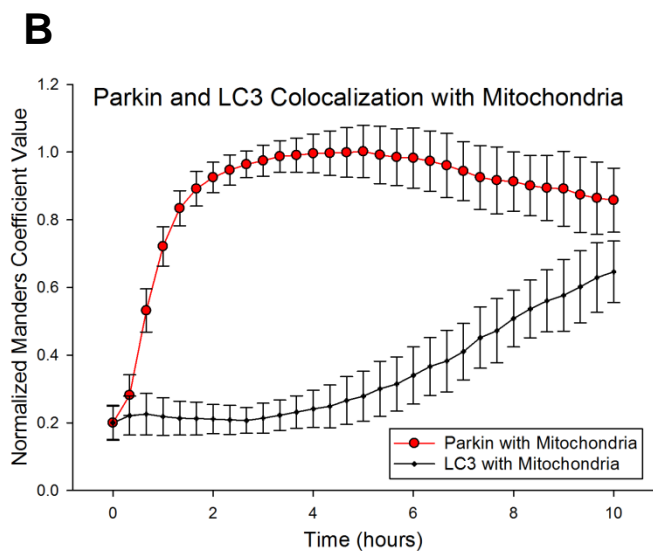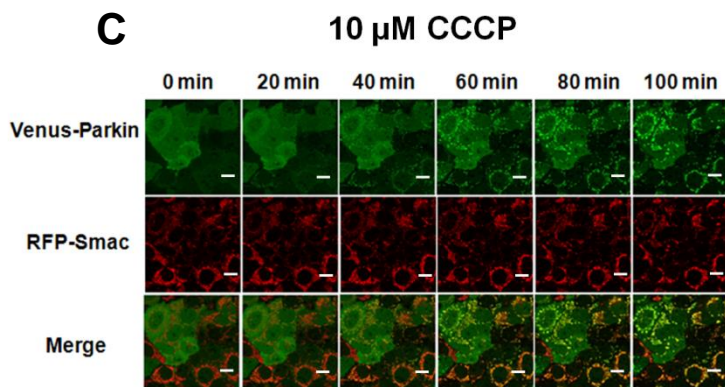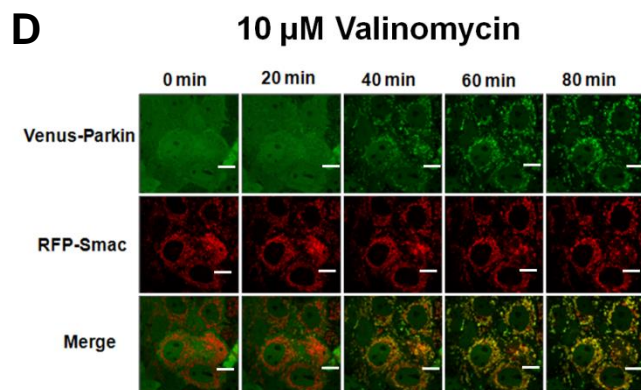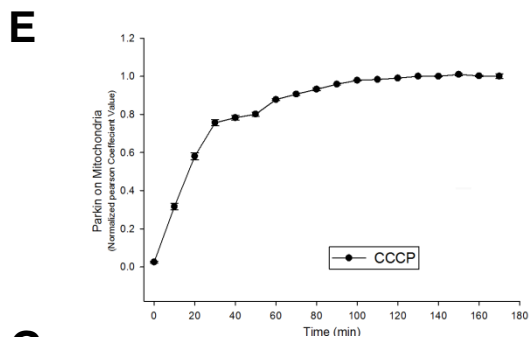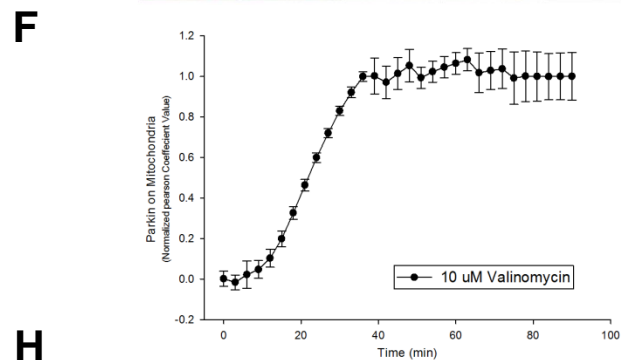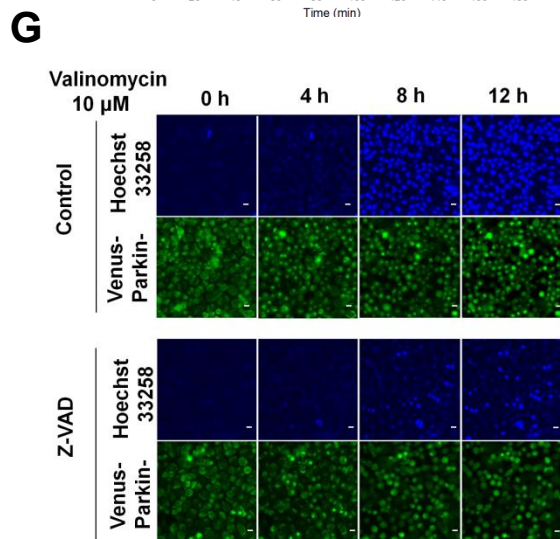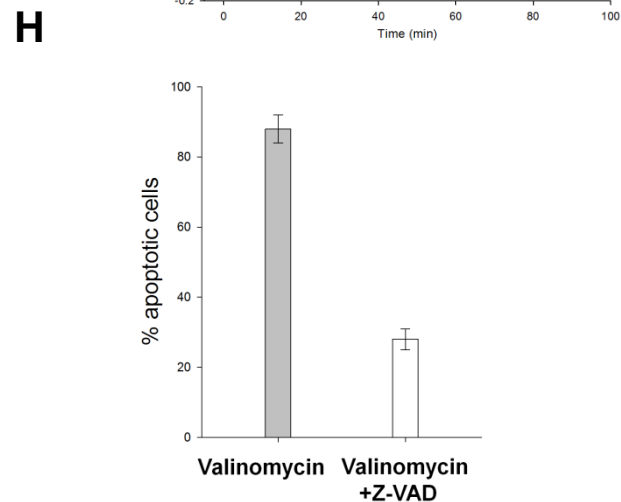

**A**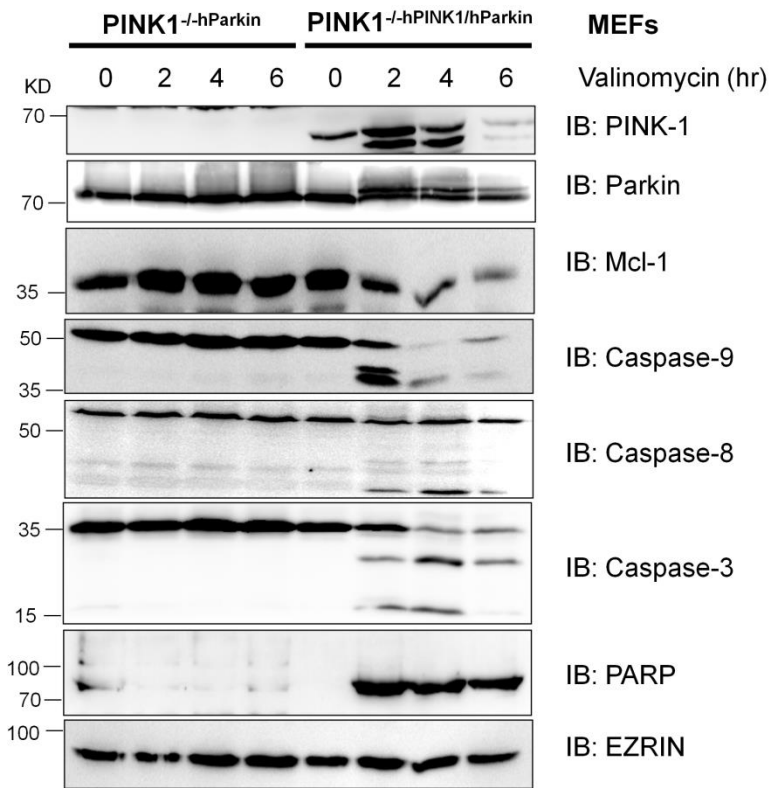**B**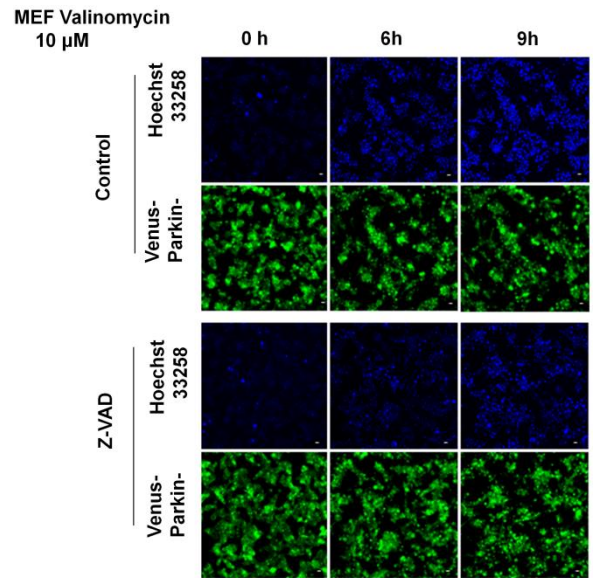**C**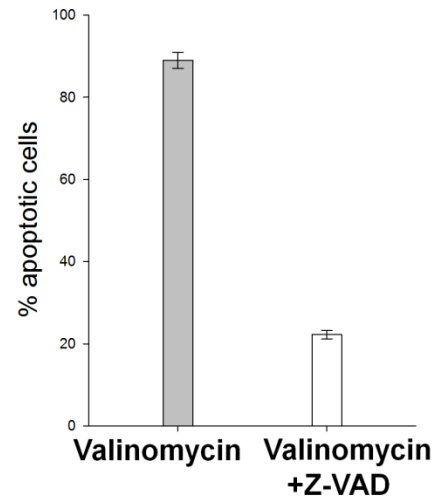

**A**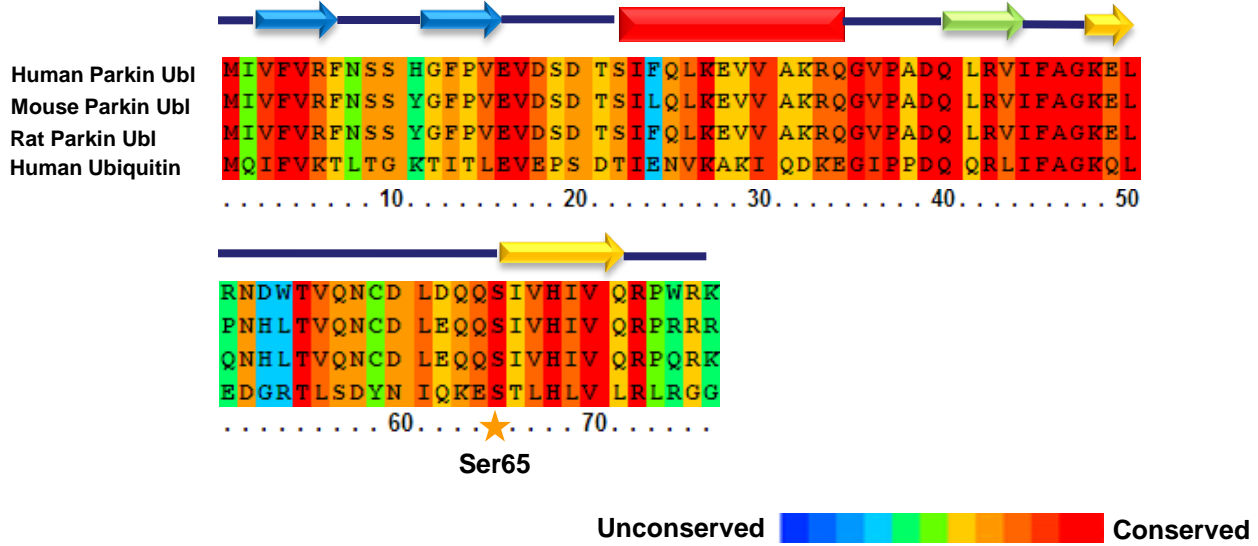**B**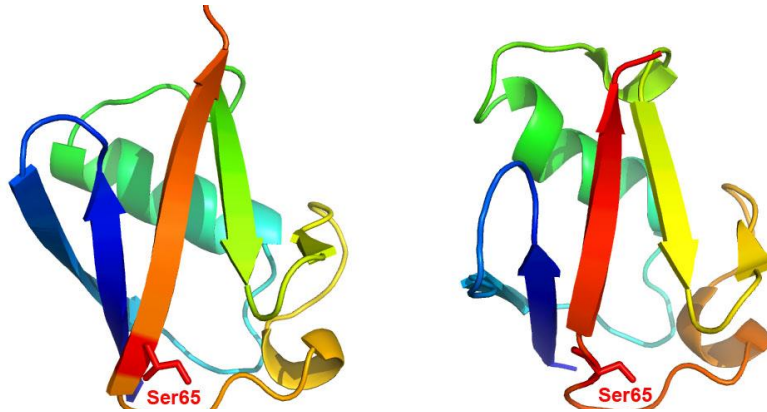**C**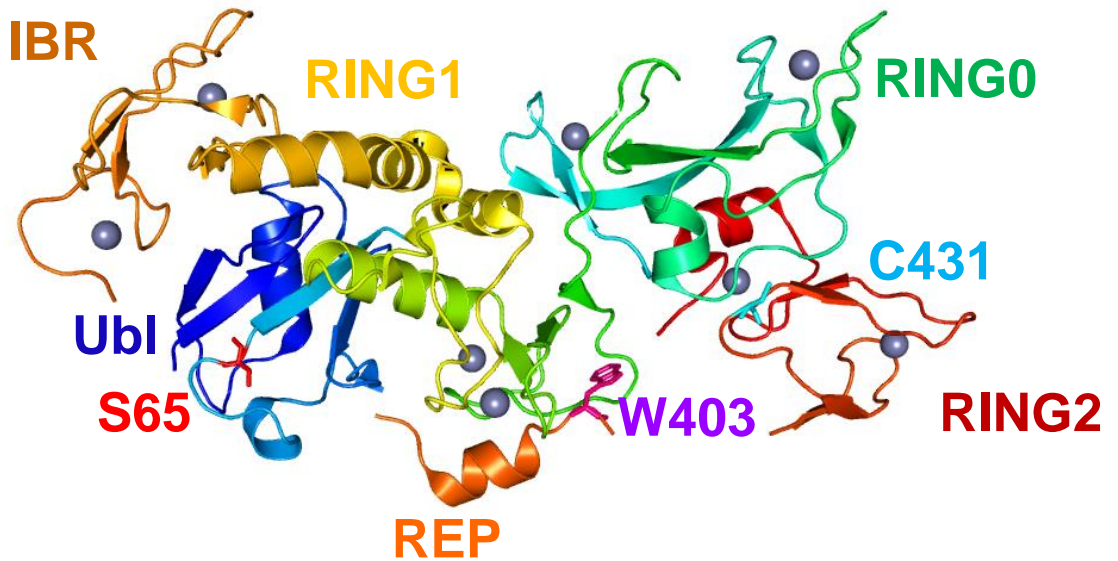

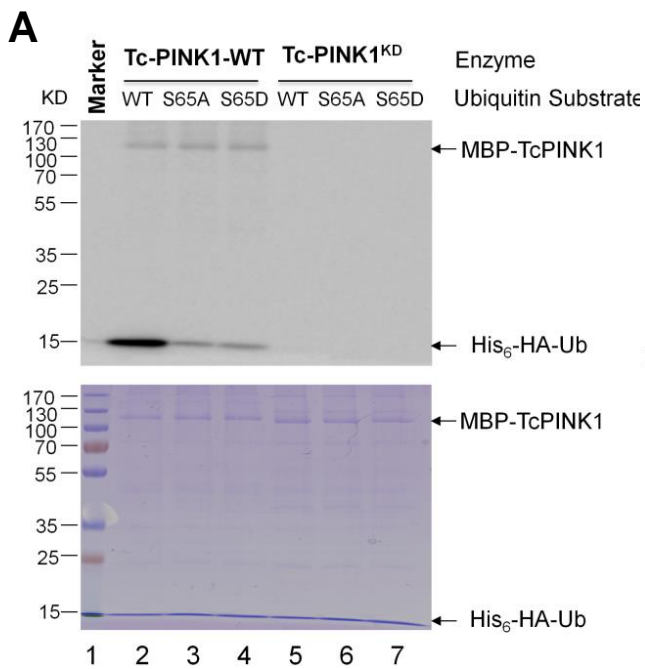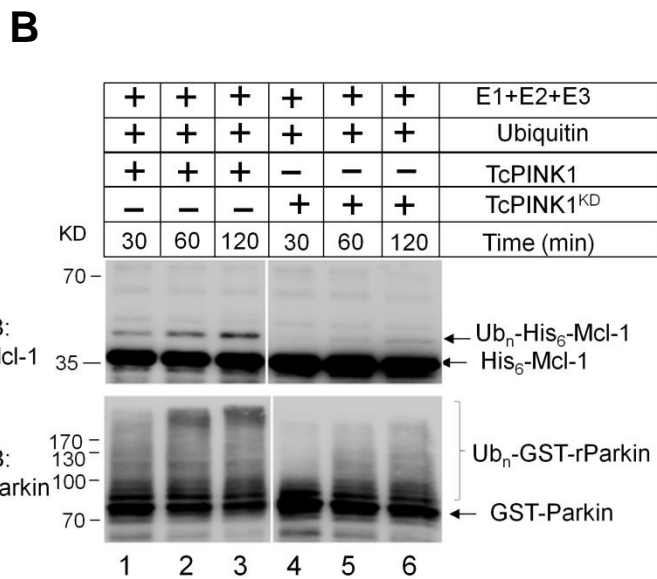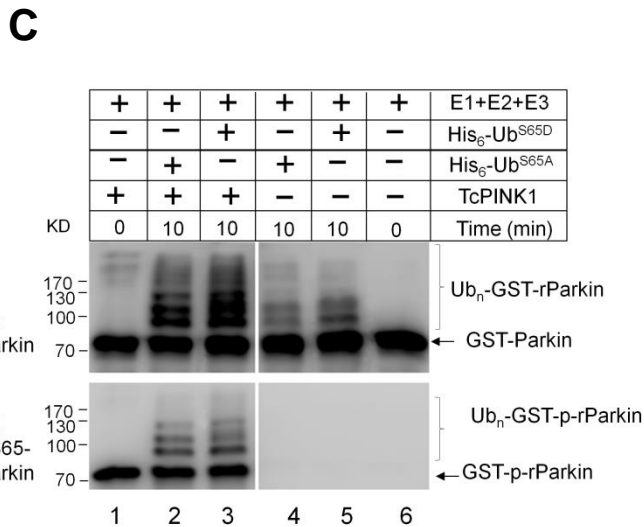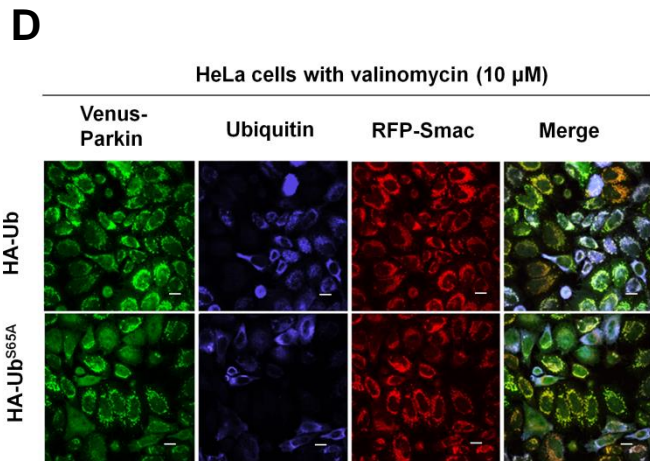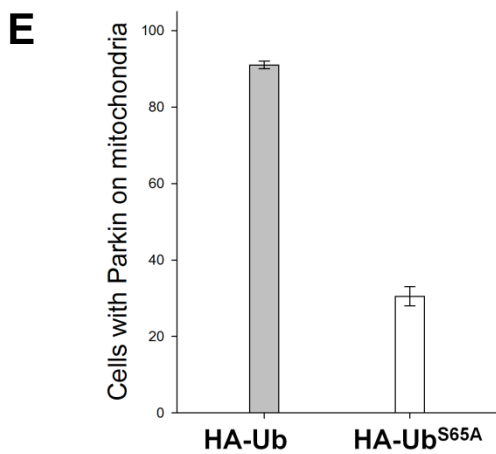

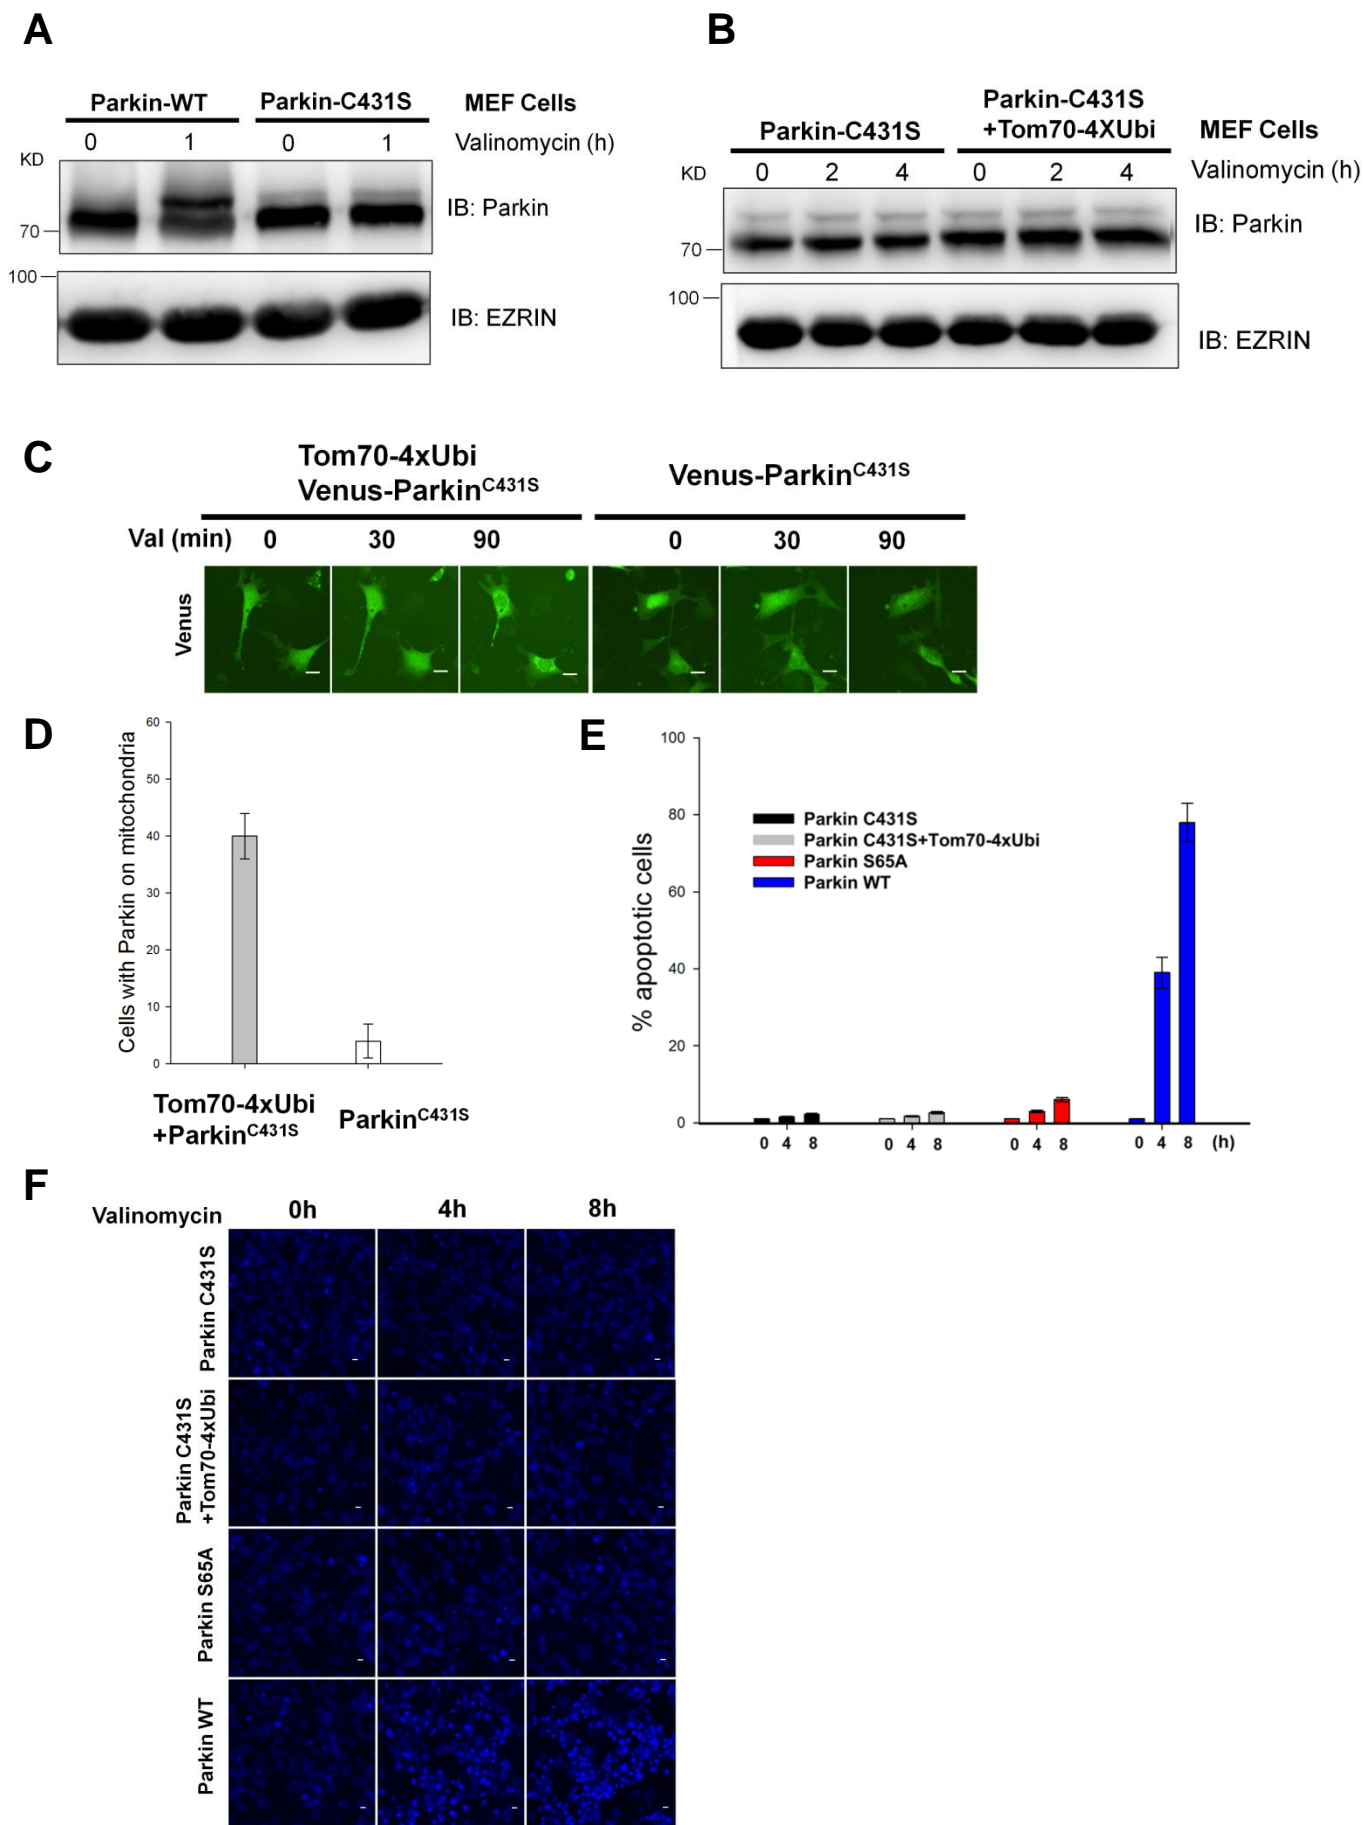

Supplementary Figure 5

Supplement: NIHMS618589-supplement-01.pdf [file NIHMS618589-supplement-01.pdf]
